# Supplementary material for: Innovative Microstructural Transformation upon CO2 Supercritical Conditions on Metal-Nucleobase Aerogel and Its Use as Effective Filler for HPLC Biomolecules Separation
Source: MDPI journal article supplement (doi:10.3390/nano12040675), 2022-02-17
Supplement: s1 [file s1]

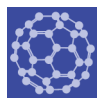

---

*Supplementary Materials*

**S1. Crystal Structure Data for CuUPrO**

**S2. Characterization Data**

**S3. Morphological Study and EDX Analysis of CuUPrO and CuUPrO@MOA**

**S4. Gel Formation Conditions**

**S5. Adsorption Study**

**S6. Theoretical Methodology and Computational Details**

**S7. Separation of Nucleobases by HPLC: Stationary Phase Column and DFT Calculations**

## S1. Crystal Structure Data for CuUPrO

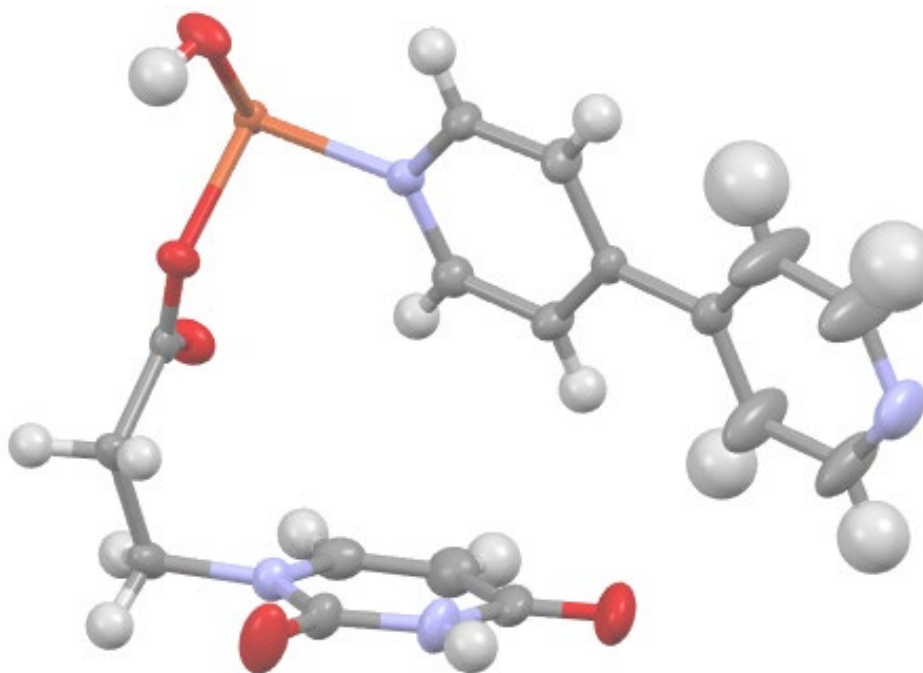

**Figure S1.** Asymmetric unit of compound CuUPrO showing the thermal ellipsoids at 50% probability level.

**Table S1.** Single-Crystal Data and Structure Refinement Details.

|                                            | CuUPrO                                                          |
|--------------------------------------------|-----------------------------------------------------------------|
| Formula                                    | C <sub>34</sub> H <sub>31</sub> CuN <sub>8</sub> O <sub>9</sub> |
| w (g mol <sup>-1</sup> )                   | 759.21                                                          |
| shape                                      | plate                                                           |
| dimensions (mm)                            | 0.19x0.12x0.08                                                  |
| T (K)                                      | 296(2)                                                          |
| space group                                | C2/c                                                            |
| a (Å)                                      | 36.9323(18)                                                     |
| b (Å)                                      | 5.9120(3)                                                       |
| c (Å)                                      | 16.9783(8)                                                      |
| β (°)                                      | 115.694(3)                                                      |
| V (Å <sup>3</sup> )                        | 3340.6(3)                                                       |
| Z                                          | 4                                                               |
| μ (mm <sup>-1</sup> )                      | 0.723                                                           |
| D <sub>calc</sub> (g cm <sup>-3</sup> )    | 1.510                                                           |
| independent reflns                         | 3057                                                            |
| reflns [I > 2σ(I)]                         | 2319                                                            |
| R <sub>int</sub>                           | 0.0773                                                          |
| Parameters                                 | 237                                                             |
| Δρ <sub>max,min</sub> (e Å <sup>-3</sup> ) | 0.534, −0.307                                                   |
| R indexes <sup>a</sup> [I > 2σ(I)]         | R1 = 0.0419                                                     |
|                                            | wR2 = 0.0843                                                    |
| R indexes (all data)                       | R1 = 0.0657                                                     |
|                                            | wR2 = 0.0937                                                    |

<sup>a</sup> R1 =  $\sum ||F_o| - |F_c|| / \sum |F_o|$ ; wR2 =  $[\sum [w(F_o^2 - F_c^2)^2] / \sum [w(F_o^2)^2]]^{1/2}$  where  $w = 1/[\sigma^2(F_o^2) + (AP)^2 + (BP)]$  with A = 0.0355 and B = 4.9975.

**Table S2.** Selected bond lengths (Å) and angles (°) for compound CuUPrO.

|         |            |                          |            |
|---------|------------|--------------------------|------------|
| Cu1-N11 | 2.032(2)   | N11-Cu1-N11 <sup>i</sup> | 169.18(13) |
| Cu1-O91 | 1.9604(17) | N11-Cu1-O91              | 89.48(8)   |
| Cu1-O1w | 2.212(3)   | N11-Cu1-O91 <sup>i</sup> | 90.85(8)   |
|         |            | N11-Cu1-O1w              | 95.41(7)   |
|         |            | O91-Cu1-O91 <sup>i</sup> | 176.47(12) |
|         |            | O91-Cu1-O1w              | 88.23(6)   |

Symmetry code: i)  $-x + 1, y, -z + 1/2$ .**S2. Characterization Data***S2.1. XRD Patterns and ATR-IR Spectra*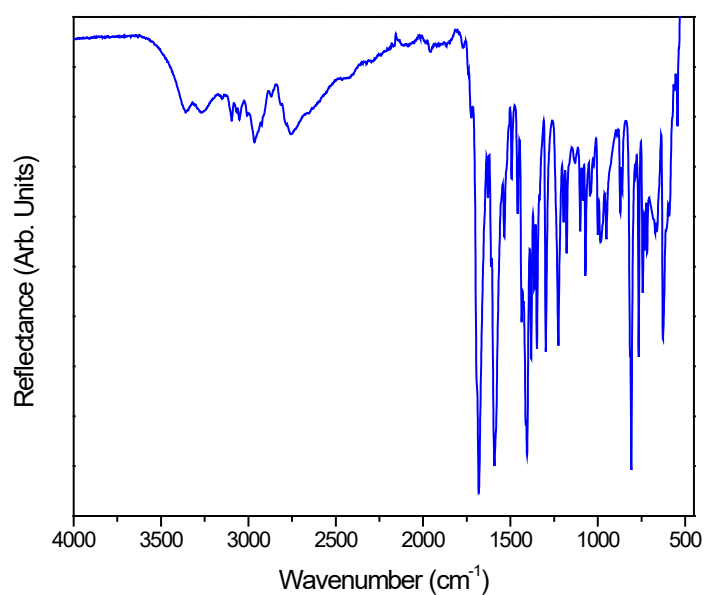**Figure S2.** IR spectra of [Cu(UPrO)<sub>2</sub>(4,4'-bipy)<sub>2</sub>(H<sub>2</sub>O)] (CuUPrO).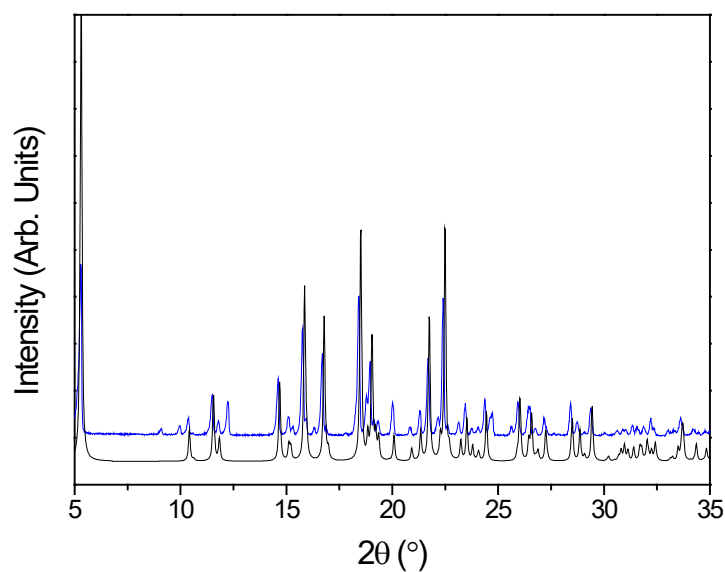**Figure S3.** PXRD patterns of [Cu(UPrO)<sub>2</sub>(4,4'-bipy)<sub>2</sub>(H<sub>2</sub>O)] (CuUPrO). Blue line corresponds to the experimental data and black line corresponds to simulated data.

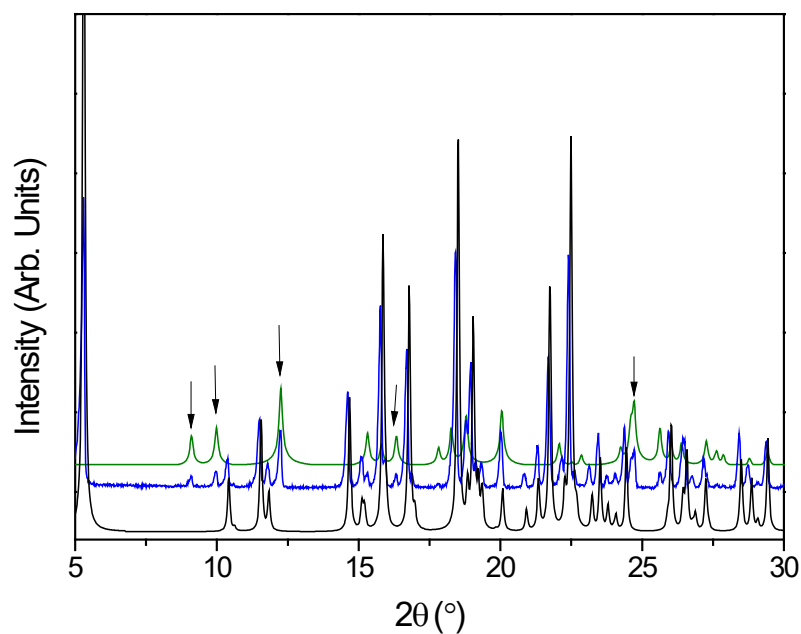

**Figure S4.** PXRD patterns of  $[\text{Cu}(\text{UPrO})_2(4,4'\text{-bipy})_2(\text{H}_2\text{O})]$  (CuUPrO), from  $\text{CuSO}_4 \cdot 5\text{H}_2\text{O}$  as starting salt, and  $[\text{Cu}(\text{SO}_4)(4,4'\text{-bipy})]_n \cdot 2n\text{H}_2\text{O}$  [43]. Blue and black lines correspond to the experimental and simulated data, respectively. Green line corresponds to the simulated data of  $[\text{Cu}(\text{SO}_4)(4,4'\text{-bipy})]_n \cdot 2n\text{H}_2\text{O}$ . Signed peaks (9.1, 9.9, 12.2, 16.3 and  $24.7^\circ$ ) indicate the presence of impurities of  $[\text{Cu}(\text{SO}_4)(4,4'\text{-bipy})]_n \cdot 2n\text{H}_2\text{O}$  in CuUPrO blue solid.

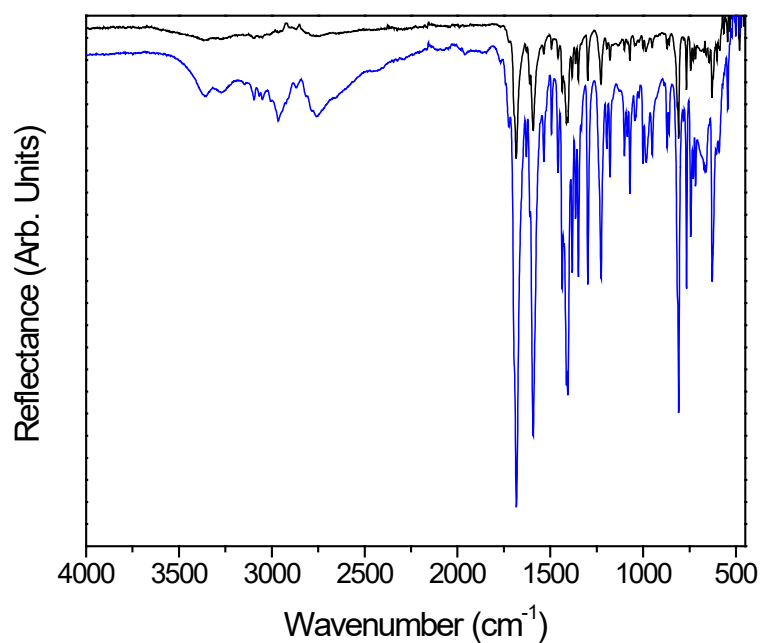

**Figure S5.** IR spectra of CuUPrO@MOA (black line) and compound CuUPrO (blue line).

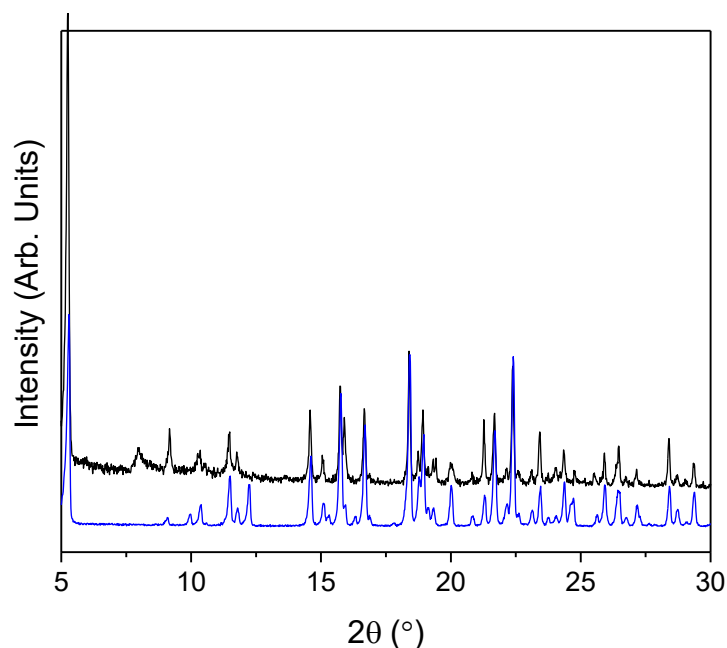

**Figure S6.** PXRD patterns of CuUPrO@MOA (black line) and compound CuUPrO (blue line).

### S2.2. CuUPrO, CuUPrO@MOA Magnetic Properties

The product of the molar magnetic susceptibility per Cu(II) and temperature ( $\chi_m T$ ) for compounds CuUPrO and CuUPrO @MOA show, at 300 K, values of ca. 0.43 and 0.49  $\text{cm}^3 \text{K mol}^{-1}$  respectively (Figure S8). These values are clearly close to the expected value for an isolated Cu(II) ion (0.413  $\text{cm}^3 \text{K mol}^{-1}$  for  $g = 2.1$ ) and magnetization ( $M$ ) can be adjusted to a Brillouin law with  $S = \frac{1}{2}$  and  $g = 2.1$ , which shows that there is no appreciable interaction between the Cu(II) atoms.

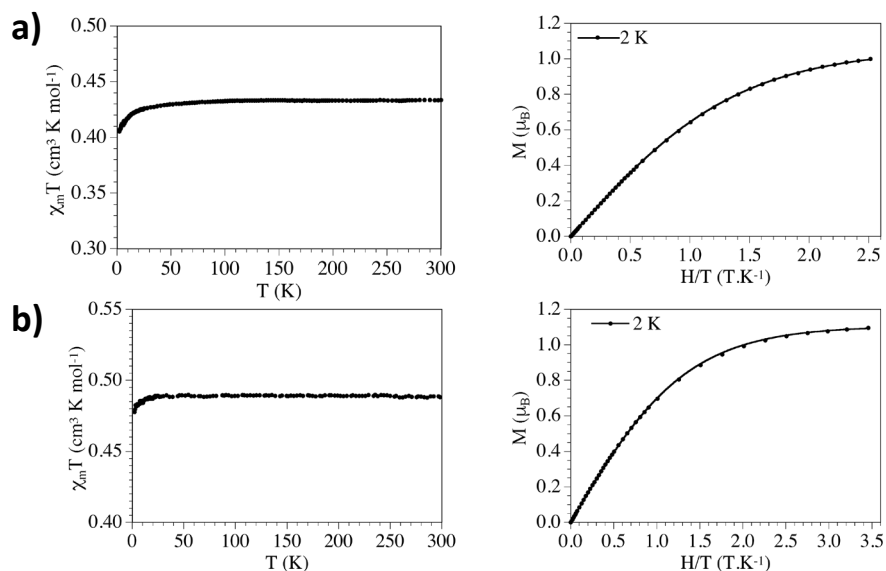

**Figure S7.** Thermal variation of  $\chi_m T$  (left) and  $M$  (right) for compounds CuUPrO (a) and CuUPrO (b).

## S2.3. Thermogravimetric Analysis

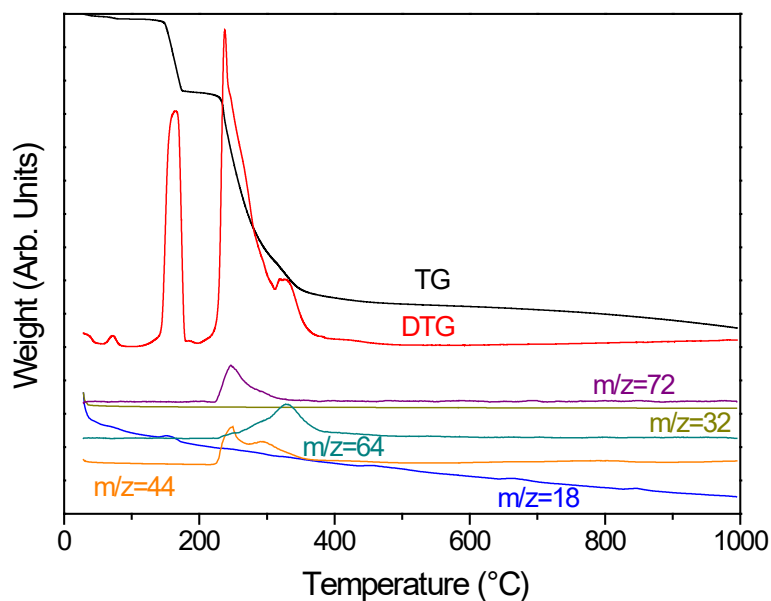

**Figure S8.** Thermal stability of compound CuUPrO in bulk, synthesized from CuSO<sub>4</sub>. Thermogram signals: black and red line (weight (TG) and derivate weight (DTG), respectively) represent the stages of the losses produced. Multicolor-labelled lines represent the ion current associated with each mass lost in each stage.

The thermal study (Figure S8) shows a first stage around 200 °C probably indicative of the loss of one coordination water and one 4,4'-bipy molecules (obsd. 23.6%, calcd. 22.9 %). Next stages, from 200 to 1000 °C, imply the loss of two UPrO<sup>•</sup> molecules and the other 4,4'-bipy residue. (obsd. 70.6%, calcd. 69.0%). These molecules are mainly lost as CO<sub>2</sub> ( $m/z$  = 44) and there is clearly evidence about the presence of SO<sub>2</sub> ( $m/z$  = 64) regarding the thermogram below.

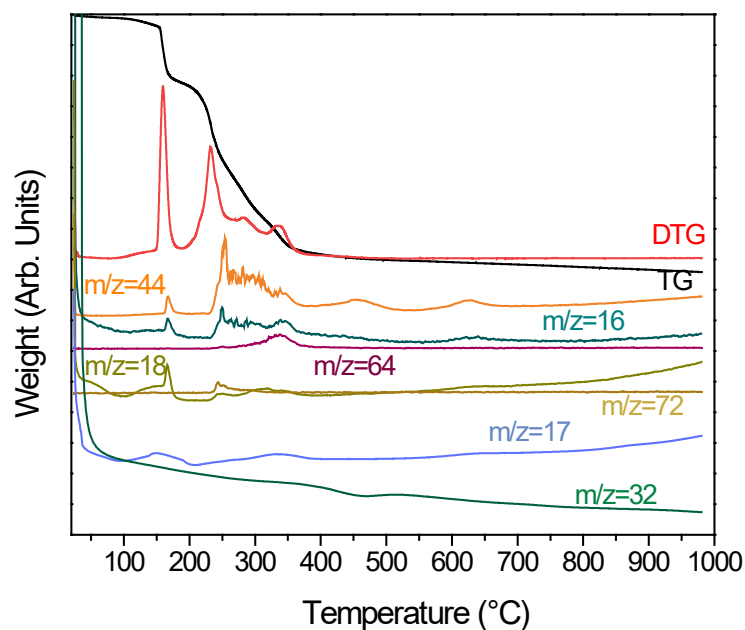

**Figure S9.** Thermal stability of compound CuUPrO@MOA. Thermogram signals: black and red line (weight (TG) and derivate weight (DTG), respectively) represent the stages of the losses produced. Multicolor-labelled lines represent the ion current associated with each mass lost in each stage.

This thermal study (Figure S9) shows a first stage at 188 °C probably indicative of the loss of methanol solvation, water molecule and one 4,4'-bipy molecules (obsd. 22.4%, calcd. 22.0%). Next stages, from 188 to 1000 °C, imply the loss of two UPrO<sub>2</sub> molecules and the other 4,4'-bipy residue. (obsd. 61.8%, calcd. 61.15%). As in the case of thermal study before, there is evidence about the presence of SO<sub>2</sub> (m/z=64) belonging to the sulphate groups.

### S3. Morphological Study and EDX Analysis of CuUPrO and CuUPrO@MOA

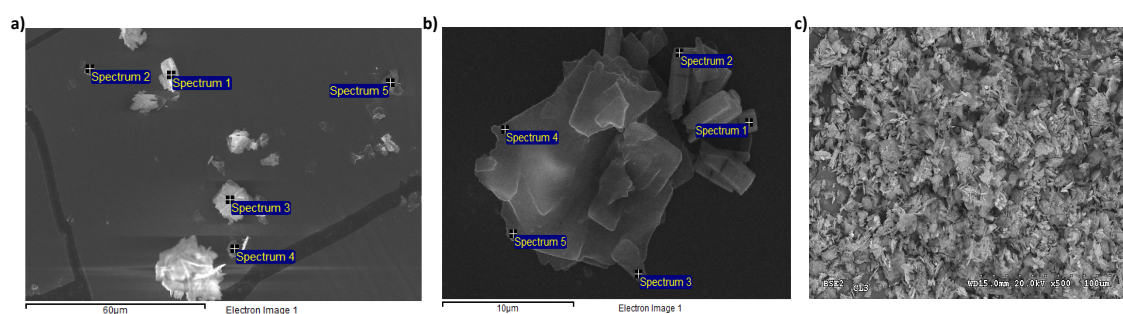

**Figure S10.** SEM-EDX images (a–c) for compound CuUPrO in bulk, synthesized from CuSO<sub>4</sub> · 5H<sub>2</sub>O.

**Table S3.** Energy-dispersive X-ray analysis for compound CuUPrO in which a corresponds to analysis in Figure S10a, b corresponds to Figure S10 b and c corresponds to Figure S10c. All results are in atomic %.

|            | Spectrum   | C              | N     | O     | Cu   | S    |
|------------|------------|----------------|-------|-------|------|------|
| Fig. S10,a | Spectrum 1 | 56.58          | 17.26 | 23.79 | 1.75 |      |
|            | Spectrum 2 | 69.51          | 10.16 | 18.79 | 0.99 |      |
|            | Spectrum 3 | 58.40          | 19.64 | 19.45 | 2.00 |      |
|            | Spectrum 4 | 66.53          | 11.55 | 20.30 | 1.29 |      |
|            | Spectrum 5 | 61.32          | 14.40 | 22.33 | 1.48 |      |
| Fig. S10,b | Spectrum 1 | 47.31          | 7.66  | 33.99 | 2.90 | 1.45 |
|            | Spectrum 2 | 49.97          | 8.99  | 31.75 | 2.69 | 1.21 |
|            | Spectrum 3 | 41.10          |       | 33.89 | 0.46 |      |
|            | Spectrum 4 | 42.64          | 7.03  | 33.42 | 0.45 |      |
|            | Spectrum 5 | 51.44          | 10.36 | 20.27 | 0.75 |      |
| Fig. S10,c | Element    | Mass. Norm (%) |       |       |      |      |
|            | C          | 62.85          |       |       |      |      |
|            | N          | 15.89          |       |       |      |      |
|            | O          | 19.88          |       |       |      |      |
|            | S          | 0.18           |       |       |      |      |
|            | Cu         | 1.17           |       |       |      |      |

The SEM-EDX analysis (Figure S10 and Table S3) showed the polycrystalline sample of compound CuUPrO contains traces of other phase (prismatic crystals in Figure S11, b, spectrum 1 and 2) as impurity that is reflected in Sulphur atomic % (Table S3, b) and in the XRD pattern (see Figure S4). Its distribution is not homogenous in the solid as we can see in Figure S10c where a large region of the same sample was analyzed.

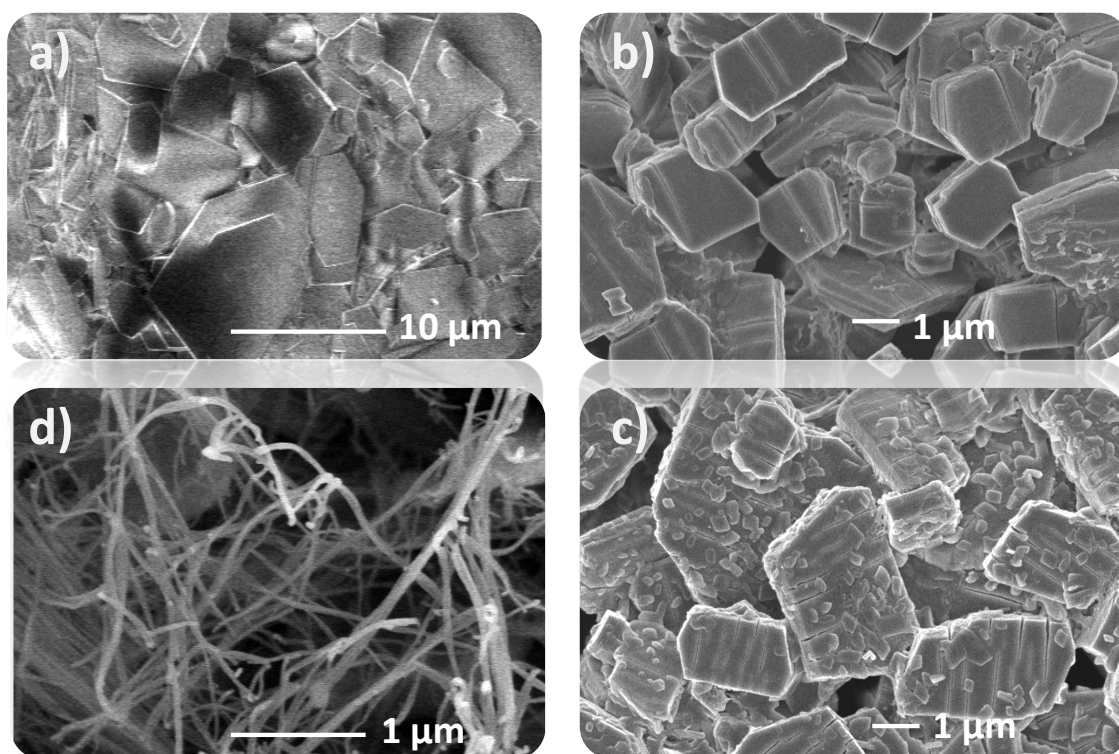

**Figure S11.** FESEM images of polycrystalline compound CuUPrO (a) and its transformation during sonication process (b), after 45 °C and its exchange with acetone (c) and finally, after its drying with supercritical CO<sub>2</sub> (d).

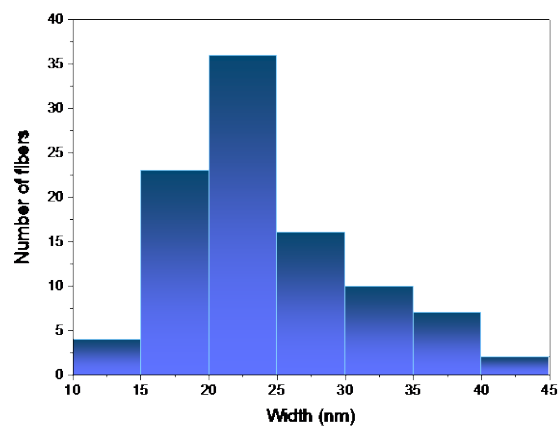

**Figure S12.** Statistical dimension based on the diameter of CuUPrO@MOA nanofibers.



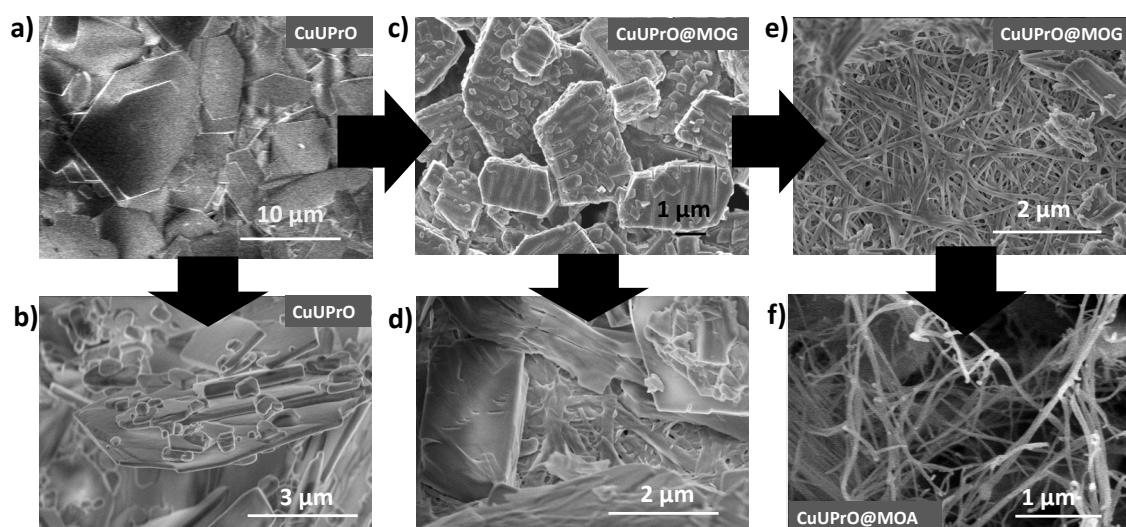

**Figure S13.** Schematic illustration of the experiments performed on pristine CuUPrO (a); after being subjected to Ar(g) for 5 h at 50 °C (b) and after applying the gel method and exchanging with acetone to obtain CuPrO@MOG (c). Upon this treatment, CuPrO@MOG is going through Ar(g) for 5 h at 50 °C (d), liquid CO<sub>2</sub> for 5 h at 50 bar and 10 °C (e) and finally, when liquid CO<sub>2</sub> goes to supercritical state (40 °C, 80 bar) (f).

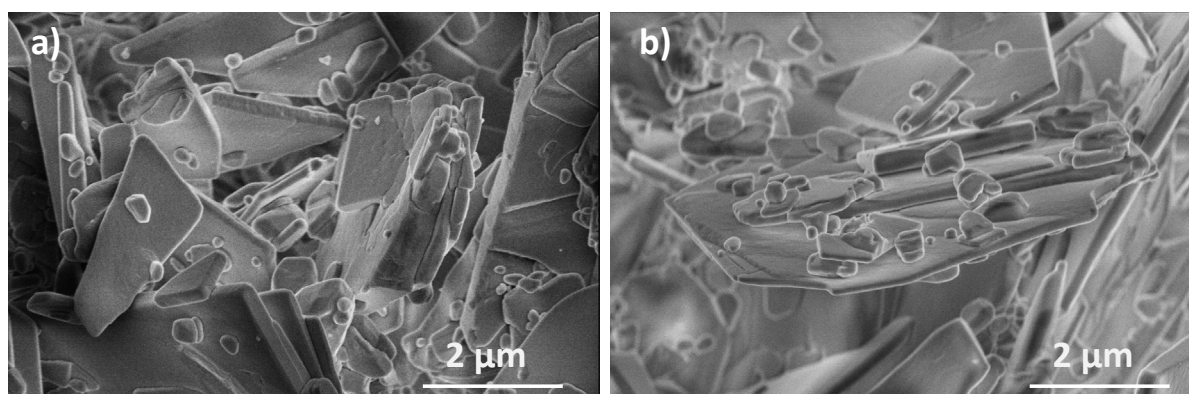

**Figure S14.** FESEM images of CuUPrO dispersed in methanol and subjected to liquid CO<sub>2</sub> for 5 h at 50 bar and 10 °C (a) and under Argon for 5 h at 50 bar at room temperature (b).

#### S4. Gel Formation Conditions

**Table S4.** Conditions of gel formation for 0.08 g of compound CuUPrO and 4 ml of solvent. UG: unconsolidated Gel; G: gel; C: colloidal suspension; P: precipitate; S: solution.

| Temperature | Time | Solvents |      |        |
|-------------|------|----------|------|--------|
|             |      | MeOH     | EtOH | 2-PrOH |
| 25°C        | 24 h | UG       | UG   | C      |
|             | 2 d  | UG       | UG   | C      |
|             | 7 d  | UG       | UG   | C      |
| 45°C        | 20'  | UG       | UG   | C      |
|             | 1 h  | UG       | UG   | C      |
|             | 4 h  | G        | G    | P      |
| 70°C        | 20'  | UG       | UG   | C      |
|             | 1 h  | P        | P    | P      |

|     |   |   |   |
|-----|---|---|---|
| 4 h | P | P | P |
|-----|---|---|---|

**Table S5.** Stability of CuUPrO@MOG versus different organic solvents, temperature and acetic acid amount. UG: unconsolidated Gel, marked in yellow; Gv: violet gel, marked in violet; Gb: blue gel, marked in blue; C: colloidal suspension; P: precipitate; S: solution.

| V <sub>AcOH</sub>        | Temperature | Time | Solvents |      |        |
|--------------------------|-------------|------|----------|------|--------|
|                          |             |      | MeOH     | EtOH | 2-PrOH |
| 0.2 ml + 15' sonication  | 25 °C       | 24 h | UG       | UG   | C      |
|                          |             | 1 d  | UG       | UG   | C      |
|                          |             | 7 d  | UG       | UG   | C      |
|                          | 45 °C       | 20'  | G        | G    | C      |
|                          |             | 1 h  | UG       | UG   | P      |
|                          |             | 4 h  | UG       | UG   | S      |
|                          | 70 °C       | 20'  | C        | C    | C      |
|                          |             | 1 h  | P        | P    | P      |
|                          |             | 4 h  | P        | P    | S      |
|                          | 25 °C       | 24 h | C        | C    | C      |
|                          |             | 1 d  | C        | C    | C      |
|                          |             | 7 d  | C        | C    | C      |
| 0.5 ml + 15' sonication  | 45 °C       | 20'  | UG       | UG   | C      |
|                          |             | 1 h  | P        | P    | P      |
|                          |             | 4 h  | P        | P    | S      |
|                          | 70 °C       | 20'  | C        | C    | C      |
|                          |             | 1 h  | P        | P    | P      |
|                          |             | 4 h  | S        | S    | S      |
|                          | 25 °C       | 24 h | P        | C    | C      |
|                          |             | 1 d  | C        | C    | C      |
|                          |             | 7 d  | C        | C    | C      |
|                          | 45 °C       | 20'  | C        | C    | C      |
|                          |             | 1 h  | P        | P    | P      |
|                          |             | 4 h  | P        | P    | S      |
| 0.75 ml + 15' sonication | 70 °C       | 20'  | C        | C    | C      |
|                          |             | 1 h  | P        | P    | P      |
|                          |             | 4 h  | S        | S    | S      |

### S5. Adsorption Study

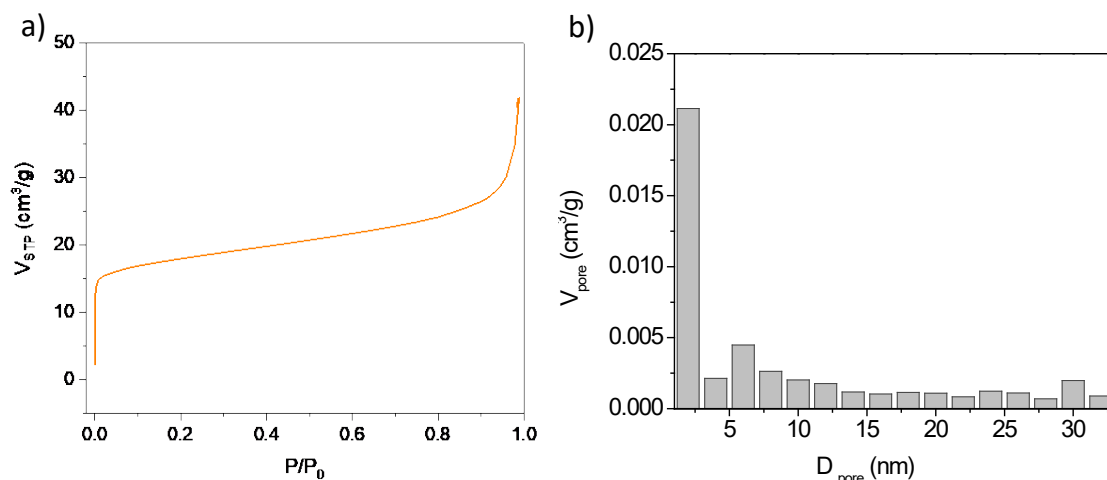

**Figure S15.**  $N_2$  adsorption isotherms (77 K) (a) and pore size distribution histogram of CuUPrO@MOA (b).

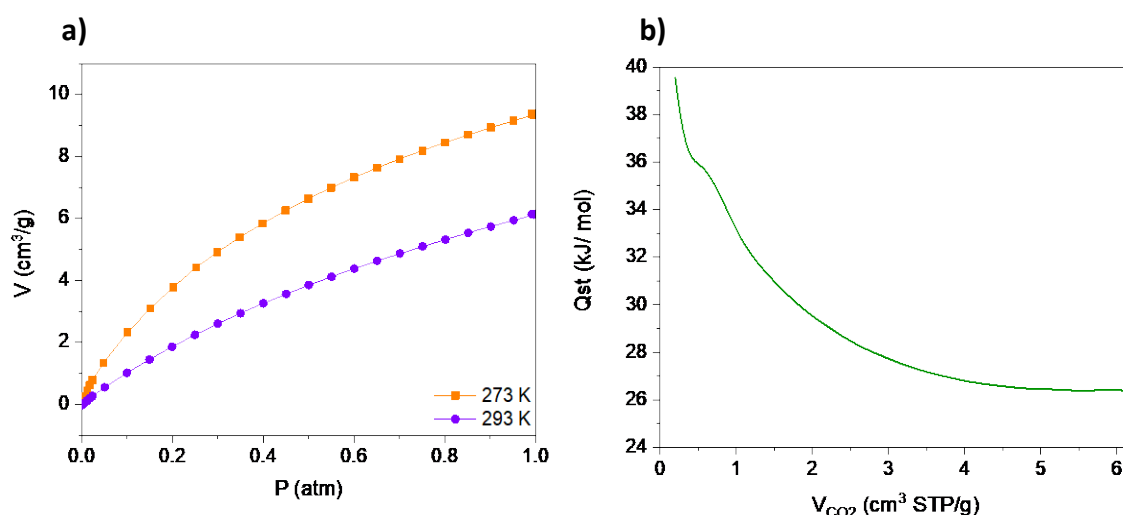

**Figure S16.**  $CO_2$  adsorption isotherm of CuUPrO@MOA at 273 and 293 K (a) and isosteric heats vs  $CO_2$  loading (b).

### S6. Theoretical Methodology and Computational Details

All the ab initio calculations have been carried out by an adequate combination of the localized basis set Gaussian16 [41] and the plane-wave QUANTUM ESPRESSO atomistic simulation packages [42]. The Gaussian16 code has been employed, within the B3LYP/cc-pVTZ level of theory [52–54], to obtain optimized structures and characterize the interaction between the  $[Cu(UPrO)_2(4,4'-bipy)_2(H_2O)]$  discrete entities, with  $CO_2$  and with different methylated nucleobases, as well as to analyze the effect in these interactions of a water solvation field. Solvent reaction field has been considered herein by the polarizable continuum model (PCM)[55] using the integral equation formalism variant, which creates the solute cavity via a set of overlapping spheres. On the other hand, the QUANTUM ESPRESSO package [42] has been adopted to account periodic conditions to evaluate intermolecular interactions within the crystalline structure of the compound. For this atomistic simulation code, one-electron wave functions are expanded on the basis of plane waves with an energy cutoff of 500 eV for kinetic energy. Electronic exchange and correlation (XC) effects have been accounted for by the revised generalized gradient corrected approximation of Perdew, Burke and Ernzerhof (GGA-PBE) [56]. Rappe–Rabe–Kaxiras–

Joannopoulos (RRKJ) ultrasoft pseudopotentials have been used to model the ion–electron interaction within the involved atomic species [57]. Brillouin zones (BZ) have been sampled using optimal Monkhorst–Pack grids. We have considered the DFT+D3 [58] perturbative correction accounting for the effect of van der Waals (vdW) forces. An empirical vdW correction is added to conventional energy density functionals in order to account for the  $R^{-6}$  behavior of the dispersive forces between atoms. The Fermi level was smeared out using the Methfessel–Paxton approach [59,60] with a Gaussian width of 0.01 eV, and all energies were extrapolated to  $T = 0$  K. Self-consistency in the electron density was converged to achieve precision in the total energy better than  $10^{-6}$  eV. The force threshold imposed for the geometrical optimization has been adjusted to reach a maximum net force acting on any atom below  $0.04 \text{ eV } \text{\AA}^{-1}$ .

#### S6.1 DFT-calculation of the $\text{CO}_2$ interaction with CuUPrO

In order to elucidate the most favorable configurations, and their corresponding adsorption energies, upon the adsorption of  $\text{CO}_2$  on CuUPrO, we have investigated a CuUPrO unit interacting with a  $\text{CO}_2$  molecule in the three a priori most reactive sites, which are shown in Figure S18 and labelled as A, B and C.

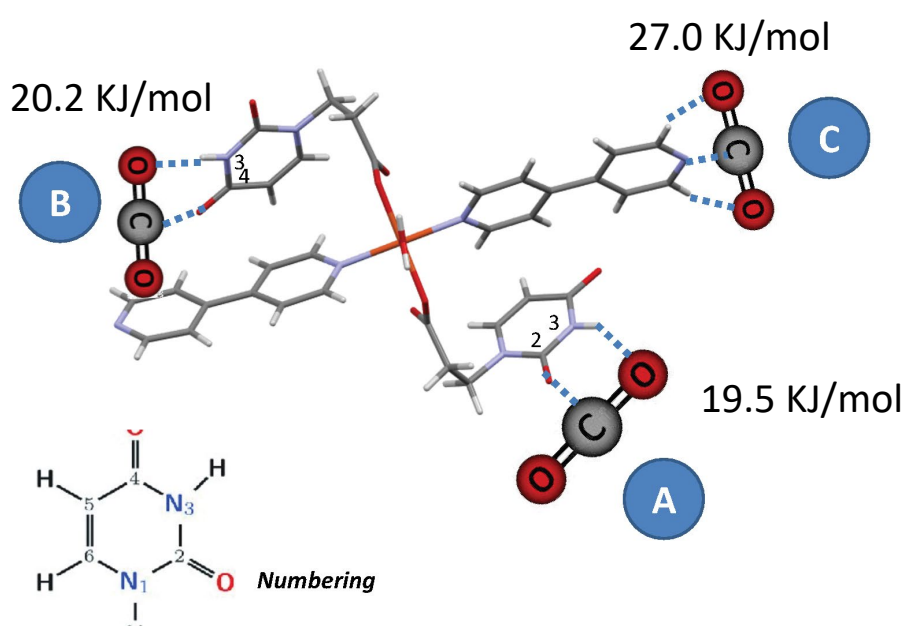

**Figure S17.** Pictorial sketch of the three most reactive sites upon the adsorption of  $\text{CO}_2$  on a CuUPrO unit labelled as A, B and C.

## S7. Separation of Nucleobases by HPLC: Stationary Phase Column and DFT Calculations

### S7.1 Stationary Phase Column Optimization

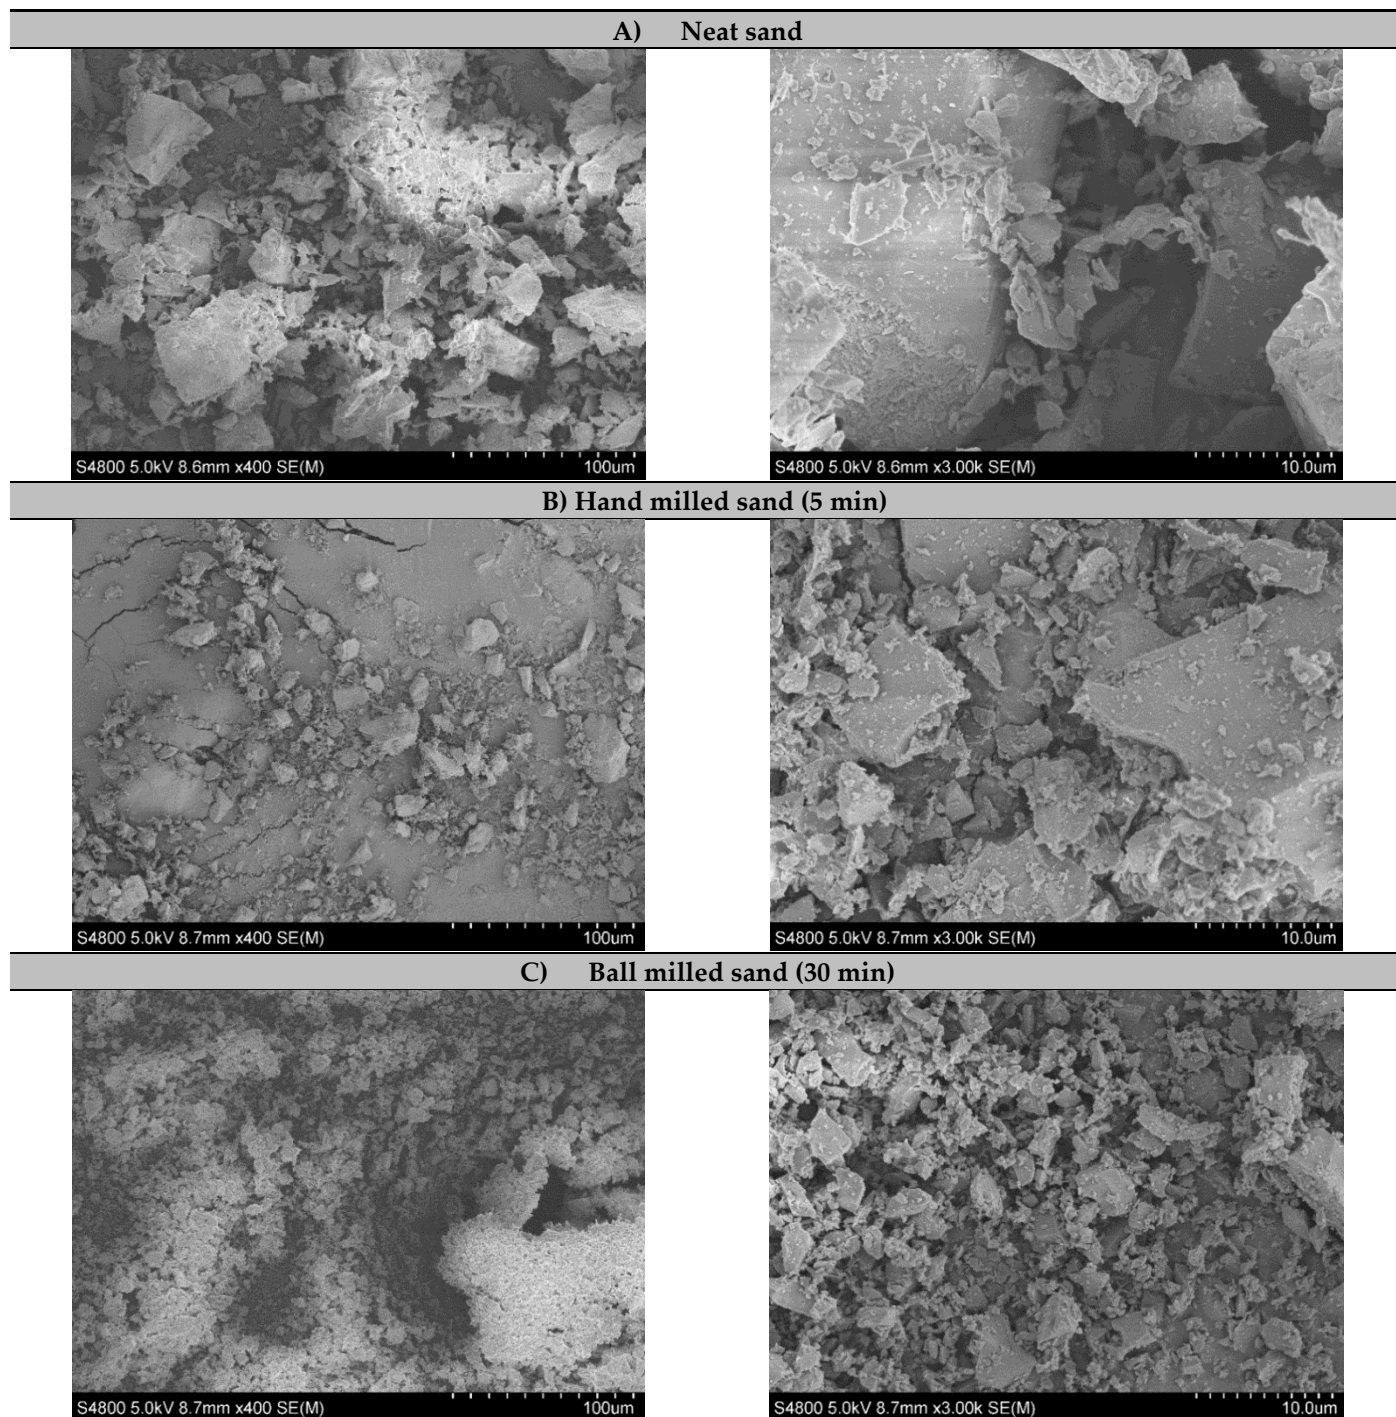

**Figure S18.** SEM images of the sample polydisperse in sizes. Grinding (especially the ball mill) reduces the maximum particle size,  $>40\ \mu\text{m}$  for neat sand (A),  $10\text{--}30\ \mu\text{m}$  for hand milled sand (B),  $<5\ \mu\text{m}$  for ball milled sand (C) and increases the fraction of smaller particles ( $<0.5\ \mu\text{m}$ ) and reduces qualitatively the polydispersion.

*S7.2 DFT-Calculation of Adsorption Configurations and Interaction Energies of CuUPrO with the Methylated Nucleobases*

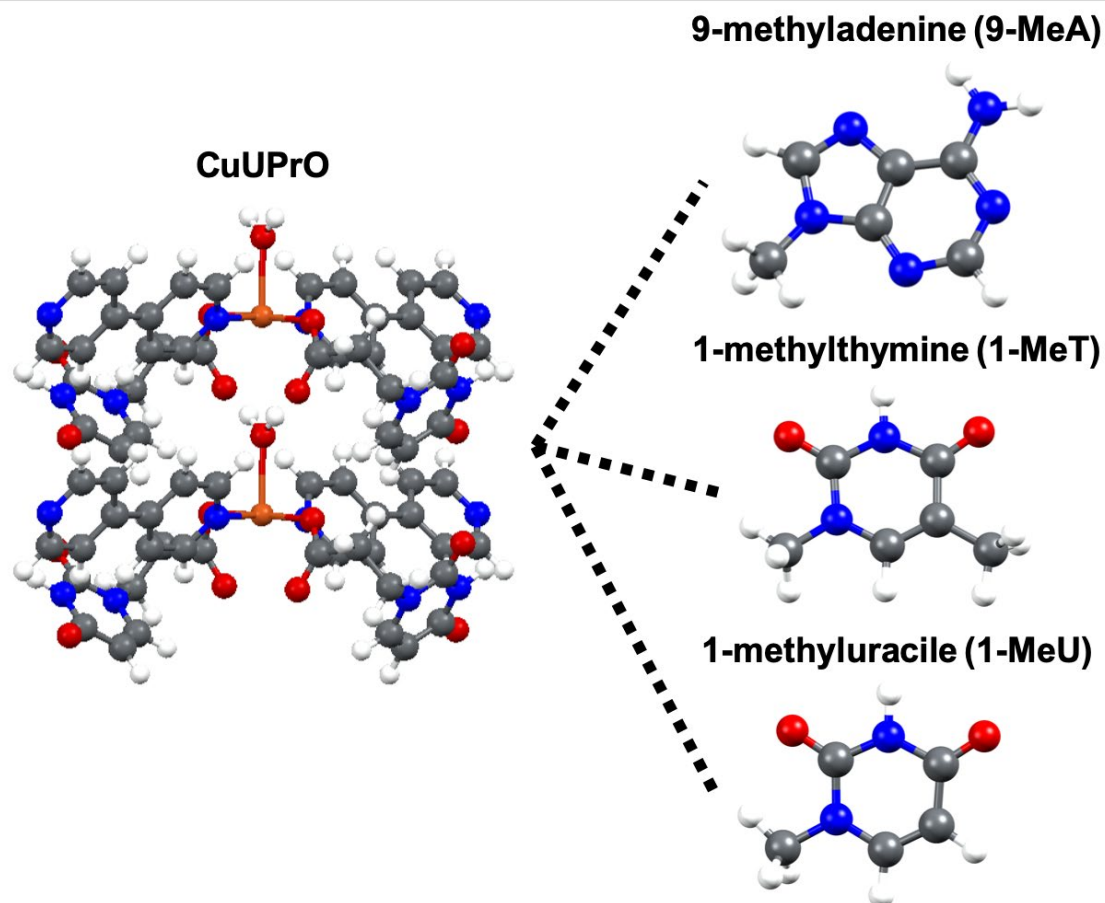

**Figure S19.** Pictorial sketch of a DFT-optimized two-entities model of CuUPrO to interact with the three methylated nucleobases 9-MeA, 1-MeT and 1-MeU (gas-phase structure).

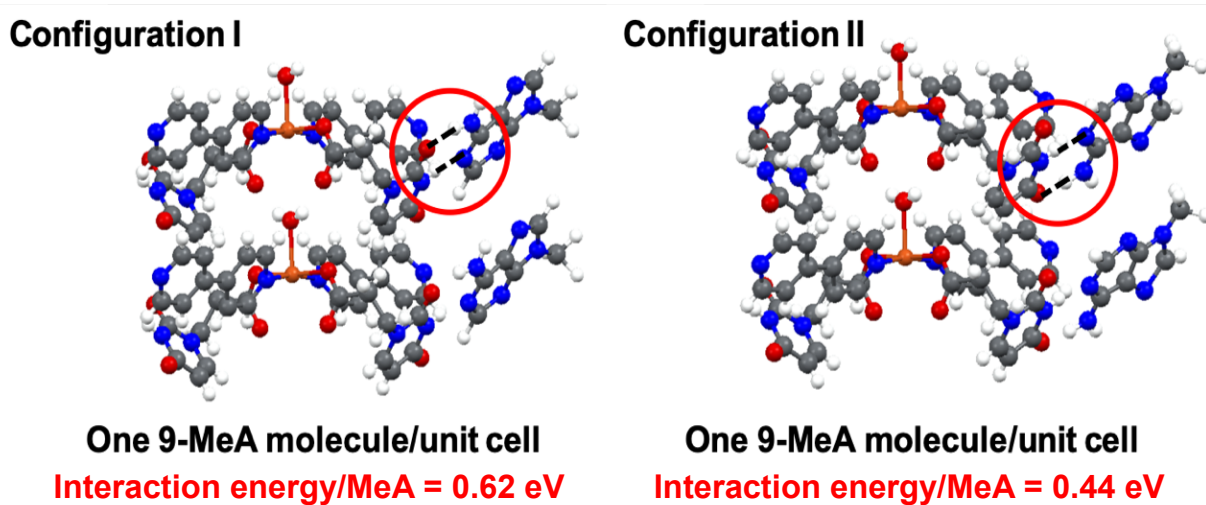

**Figure S20.** Different DFT-optimized configurations of 9-MeA adsorbed on the CuUPrO discrete entities with two different adsorption configurations. Two units are shown for a better appreciation



of the longitudinal “head-to-tail” monodimensional arrangement. Interaction energy per MeA is also indicated in each case.

**Configuration I**

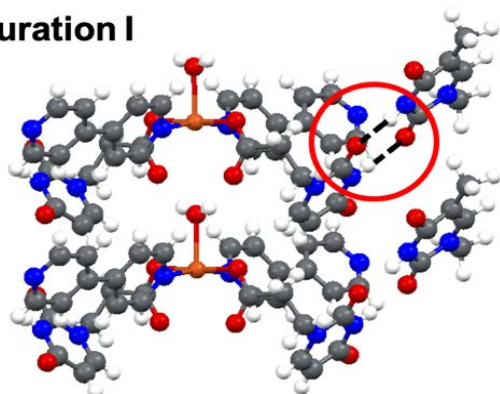

**One 1-MeT molecule/unit cell**

**Interaction energy/MeT = 0.32 eV**

**Configuration II**

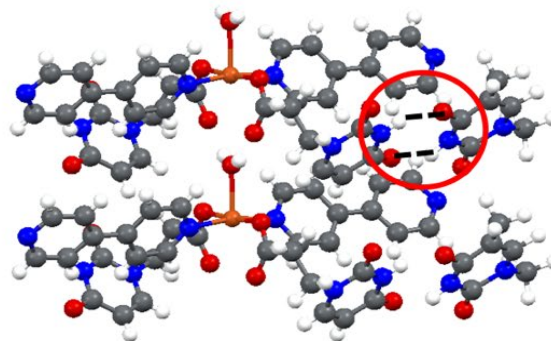

**One 1-MeT molecule/unit cell**

**Interaction energy/MeT = 0.21 eV**

**Figure S21.** Different DFT-optimized configurations of 1-MeT adsorbed on the CuUPrO discrete entities with two different adsorption configurations. Two units are shown for a better appreciation of the longitudinal “head-to-tail” monodimensional arrangement. Interaction energy per 1-MeT is also indicated in each case.

**Configuration I**

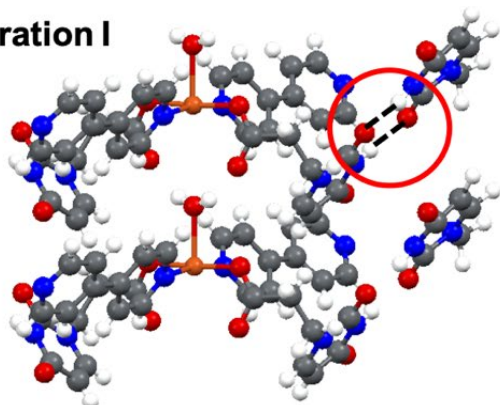

**One 1-MeU molecule/unit cell**

**Interaction energy/MeU = 0.33 eV**

**Configuration II**

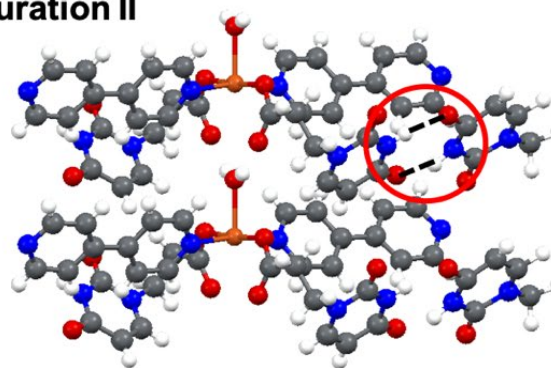

**One 1-MeU molecule/unit cell**

**Interaction energy/MeU = 0.23 eV**

**Figure S22.** Different DFT-optimized configurations of 1-MeU adsorbed on the CuUPrO discrete entities with two different adsorption configurations. Two units are shown for a better appreciation of the longitudinal “head-to-tail” monodimensional arrangement. Interaction energy per 1-MeU is also indicated in each case.
